# Supplementary material for: Horizontal gene transfer drives the evolution of Rh50 permeases in prokaryotes
Source: PubMed Central journal article supplement (PMC5209957; doi:10.1186/s12862-016-0850-6), 2017-01-03
Supplement: 12862_2016_850_MOESM2_ESM.pdf [file 12862_2016_850_MOESM2_ESM.pdf]

## Legends of Supplementary Figures S1-S4

**Fig. S1.** Full phylogeny of Rh50 proteins (90 taxa, 252 sites). Bayesian majority-rule consensus of 1,076 trees obtained under the LG+Γ4 mixture model in PhyloBayes. Two independent chains were run for 13,765 cycles, until chains reached convergence (maxdiff=0.0900641, effective size>100), discarding 20% of cycles as “burn-in” and sampling each 10th cycle. Black dots at relevant nodes indicate that the corresponding branch was supported by Bayesian posterior probabilities  $\geq 0.95$ . Species oxygen requirements are denoted as follows: anaerobic (red dot), facultative (green square), aerobic (blue diamond). *Proteobacteria bacterium* JGI 0000113-E04 is highlighted in red. The scale-bar indicates the estimated number of substitutions per site.

**Fig. S2.** Bayesian phylogeny of *Proteobacteria bacterium* JGI 0000113-E04 beta-galactosidase/beta-glucuronidase (D341DRAFT\_01804). The phylogeny was inferred in PhyloBayes under the CATGTR +Γ4 model (maxdiff = 0.16515; eff. size > 100). Bayesian posterior probabilities  $\geq 0.95$  are indicated by dots at nodes. D341DRAFT\_01804 is sister to the choanoflagellate *Monosiga* (red-dot node). The scale-bar indicates the estimated number of substitutions per site.

**Fig. S3.** Rooted phylogeny of Amt proteins (229 taxa, 316 sites). Maximum likelihood tree under the LG+Γ4+F model in RAxML. The Amt2 taxon sampling included representative sequences from previous studies on HGT in the AMT family [25-27]. ML inference showed that AMTs from RH50-coding genomes all belonged to the Amt2 family. Therefore, in the final dataset only 7 Amt1 sequences were retained, as outgroup, to root the Amt2 tree. MSA was carried out in Praline<sup>TM</sup> and only columns with TCS  $\geq 6$  were retained (see Methods). The best-fitting model in ProtTest was LG+Γ4+F. ML inference was performed in RAxML and IQ-TREE. BI (under LG+Γ4) did not reach convergence (even after 12,000 cycles) likely due to the insufficient number of sites in the MSA with respect to the number of sequences. Branch support values relevant for discussion are given and displayed in the following order: Bayesian posterior probabilities, RBS (1,000 bootstrap replicates in RAxML), and UFBoot (10,000 bootstrap replicates in IQ-TREE). The 49 AMTs present in RH50-coding genomes are denoted by red diamonds. Branches colour-codes are: methanogens and other Euryarchaeota (blue), anammox (red), Planctomycetes (orange), Firmicutes (purple). Anammox are grouped in four clades. In Clades A and B, there is evidence of HGT between methanogens, anammox and Firmicutes. *Proteobacteria bacterium* JGI 0000113-E04 (black dot). The scale-bar indicates the estimated number of substitutions per site.

The anammox AMTs form 4 clusters (anammox1-4). Anammox cluster3 is sister to other Planctomycetes. Instead, the topologies of the two anammox clusters are informative; anammox cluster1 is nested within

archaeota comprising also methanogens (Clade A), and anammox cluster2 is nested within methanogens (Clade B). These topologies suggest a potential directional HGT from methanogens to anammox. One of the Amt paralogs of *Geobacter M21* is sister to *A. cellulolyticus* and both lie in Clade A; the other *Geobacter* Amt is sister to three methanogens. *C. papyrosolvans* and the second Amt from *A. cellulolyticus* lie in Clade B. Overall, these data lend support to potential HGT trajectories already hinted by the Rh50 phylogeny, namely those between anammox and methanogens (Clades A and B), *Geobacter* and Firmicutes (Clade A), Firmicutes and methanogens (Clade B).

**Fig. S4.** Topology testing for the RH50\_prok\_meth clade.

In the Rh50 phylogeny, two competing topologies for the RH50\_prok\_meth clade were found: either as sister to the anammox (Tree1; red-dot node) or as basal to the Rh50\_prok clade (Tree2; blue-dot node). Topology tests were carried out on a subset of 20 amino acids sequences. Per-site log-likelihoods were calculated in RAxML under the LG+ $\Gamma$ 4+F model; these were used to perform the ELW test (as implemented in RAxML) and were also analysed in CONSEL. All tests supported Tree1 topology.

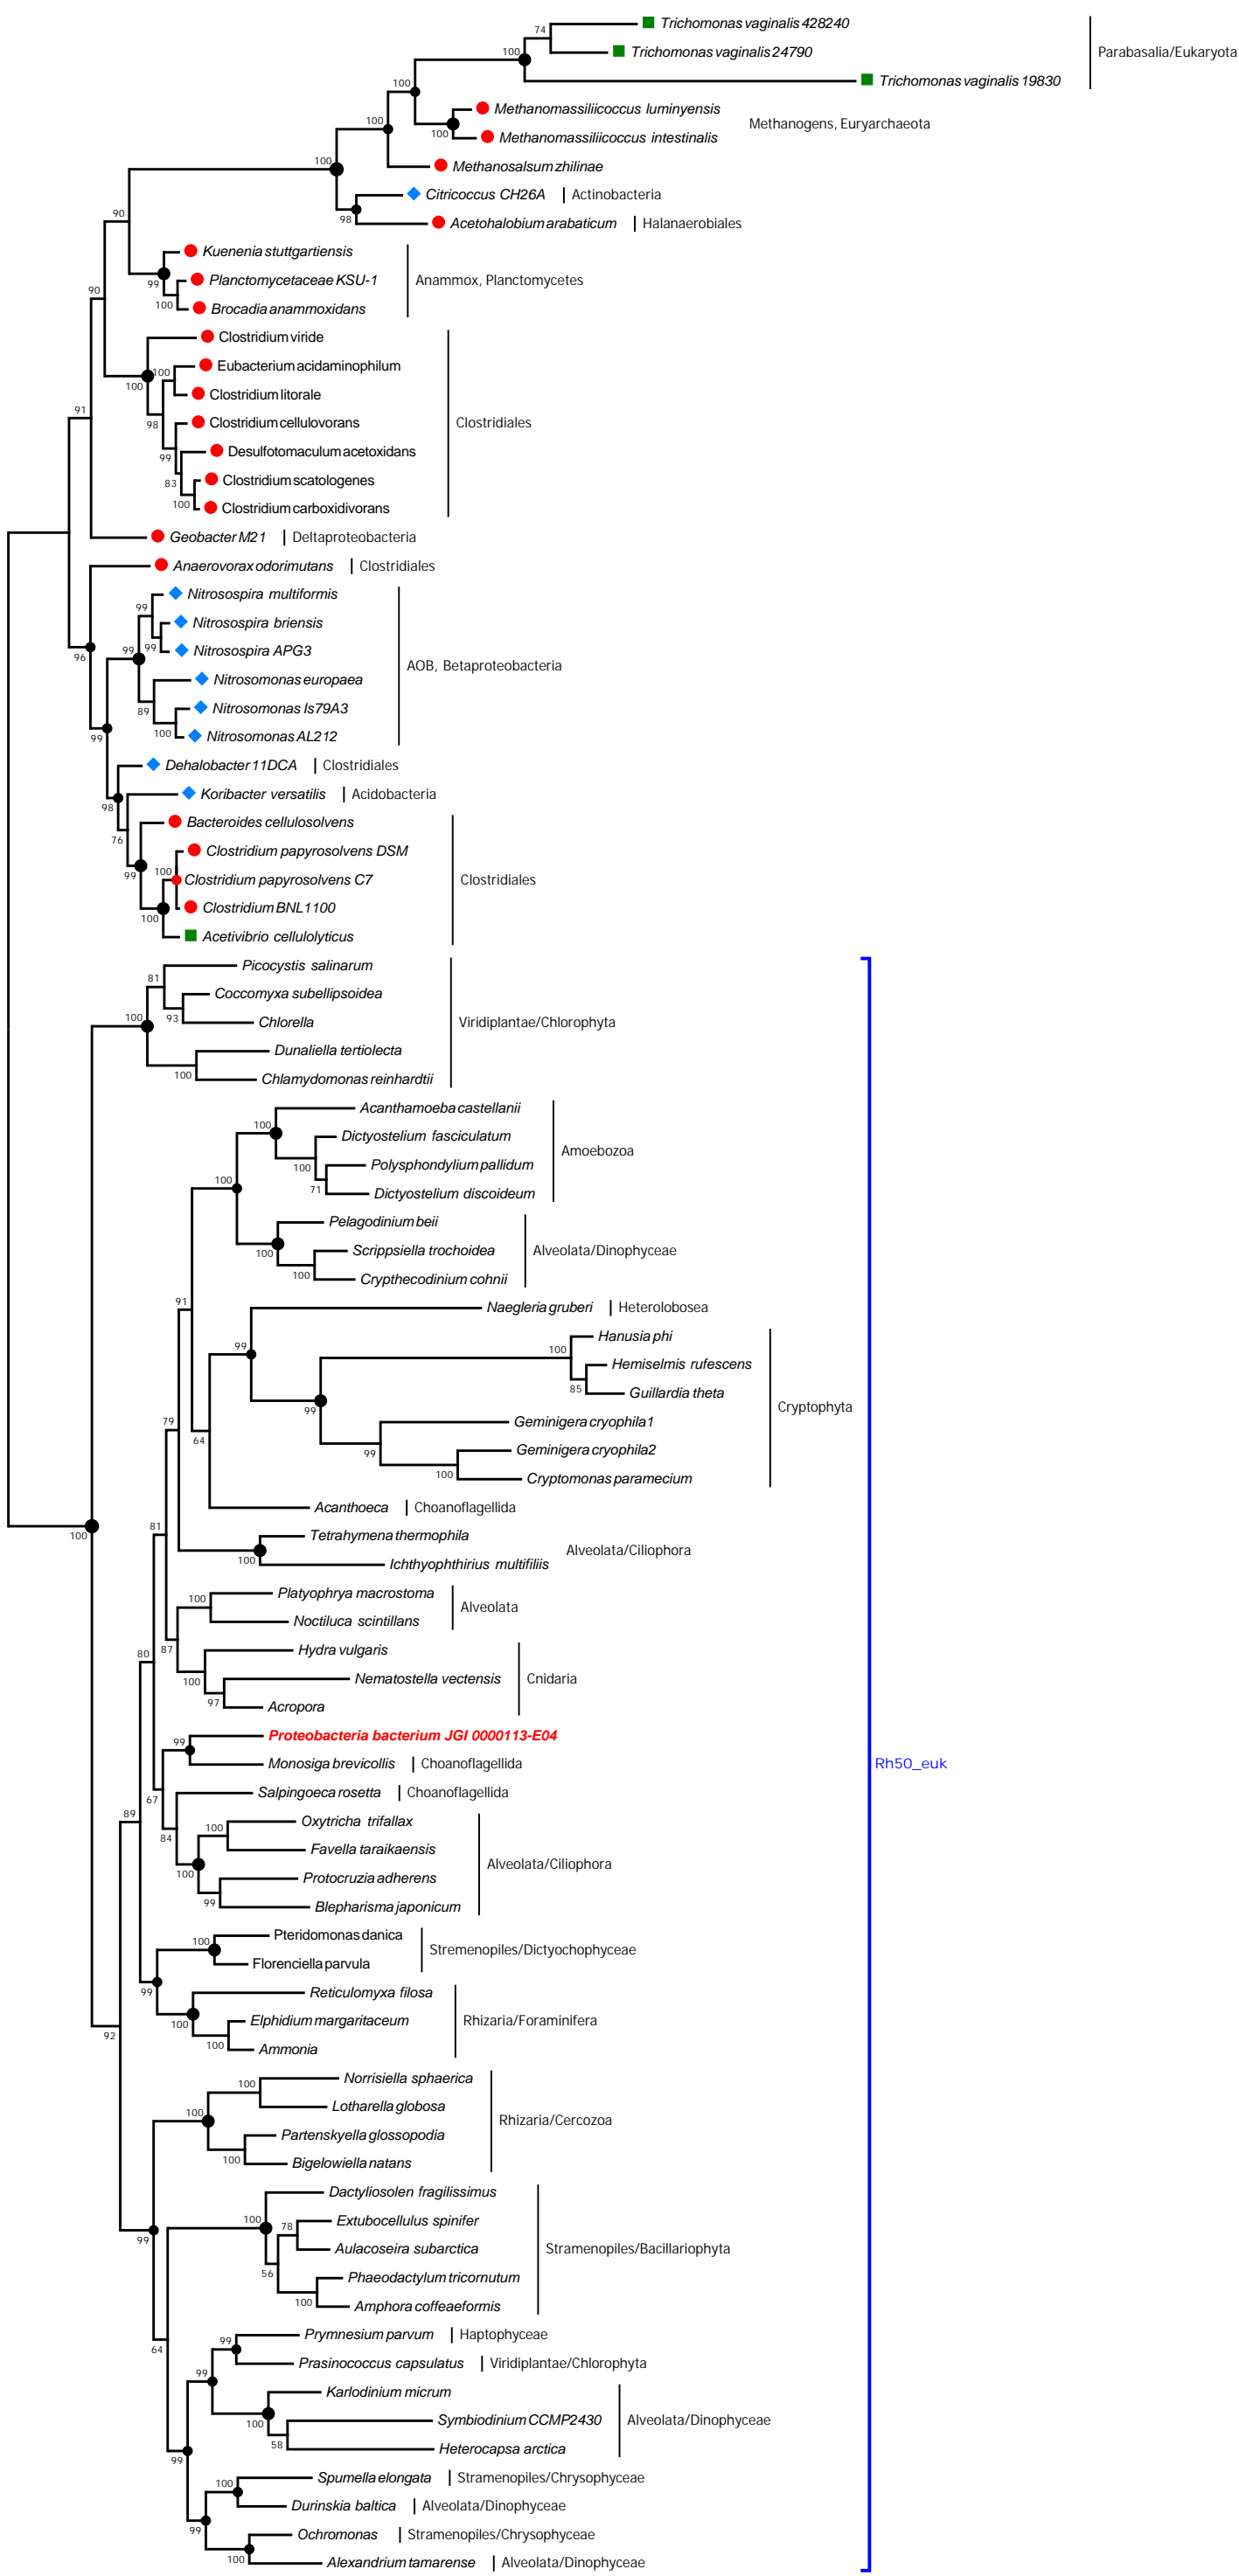

Fig. S1

Fig. S2

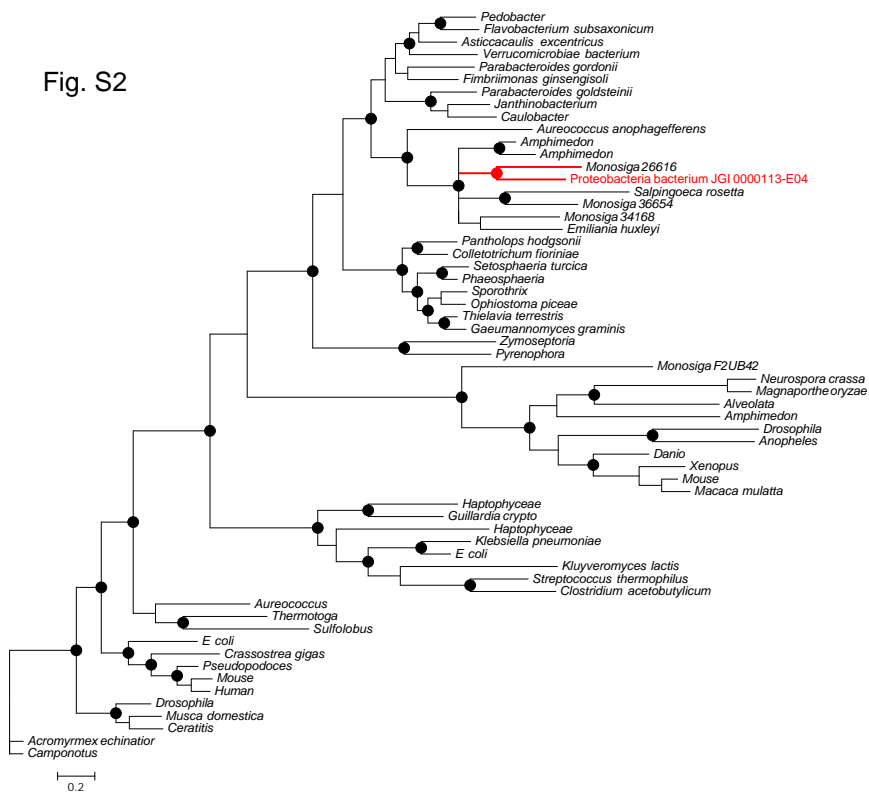

Fig S3

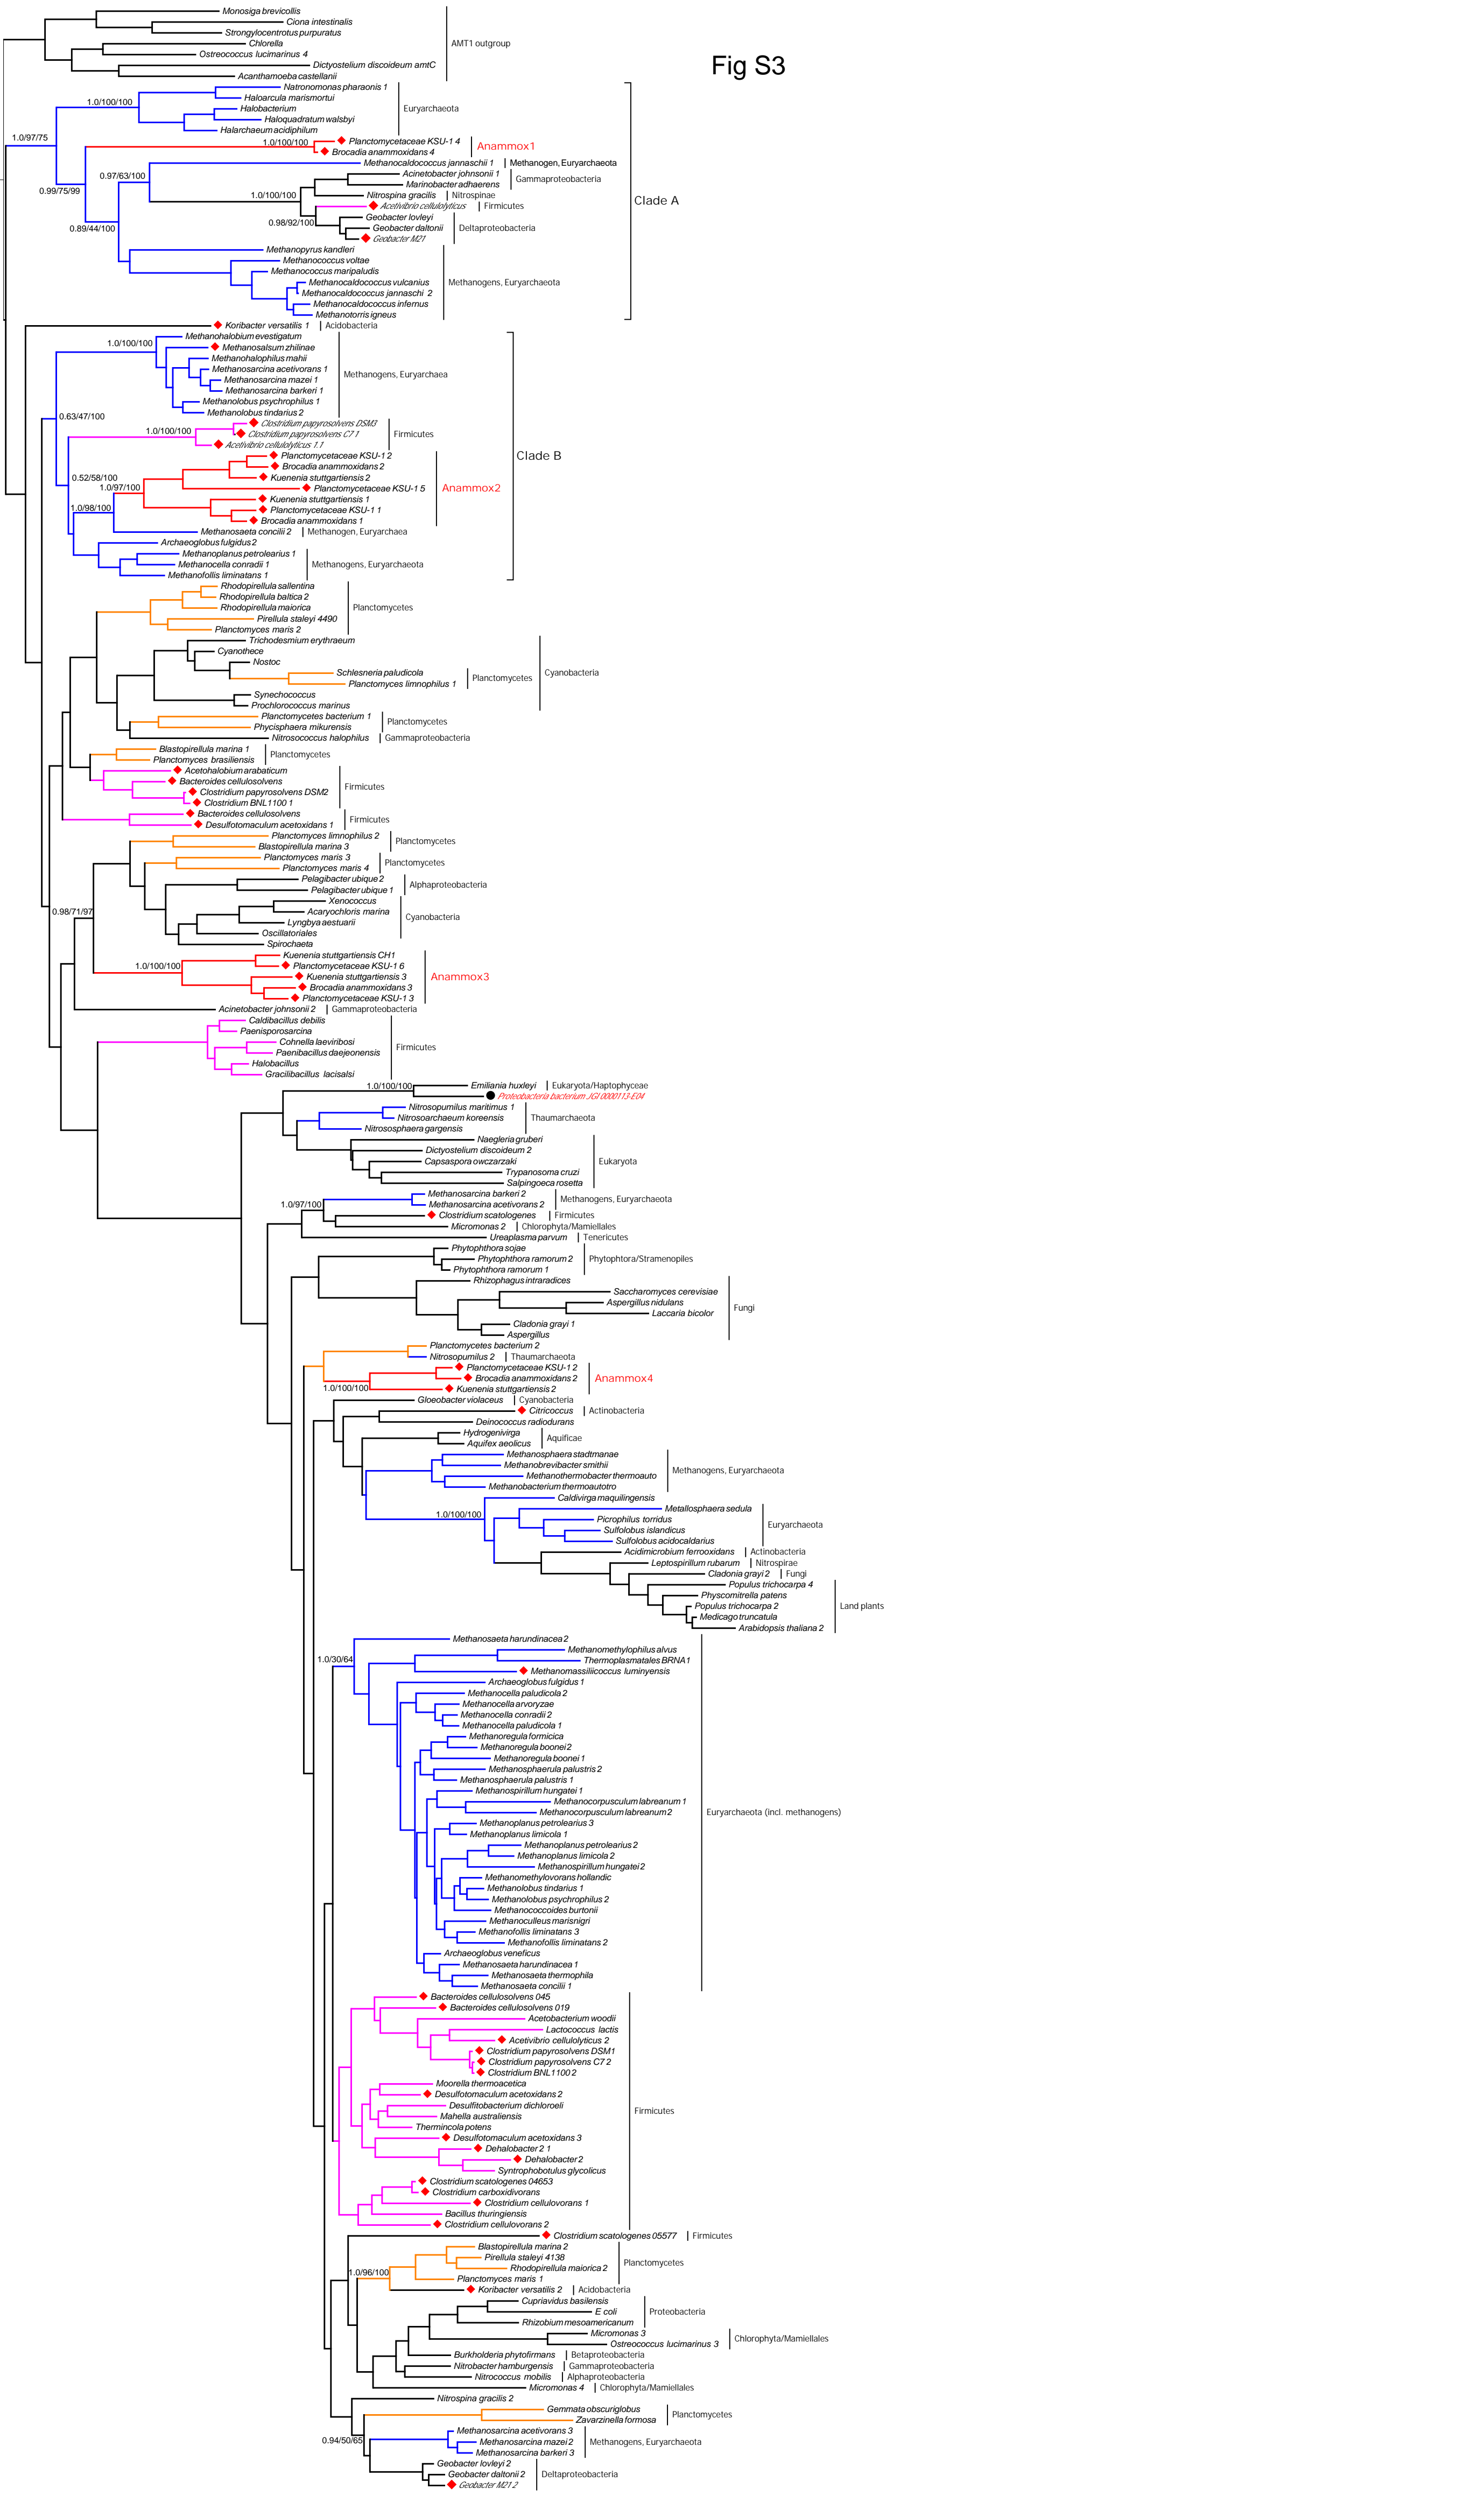

0.5

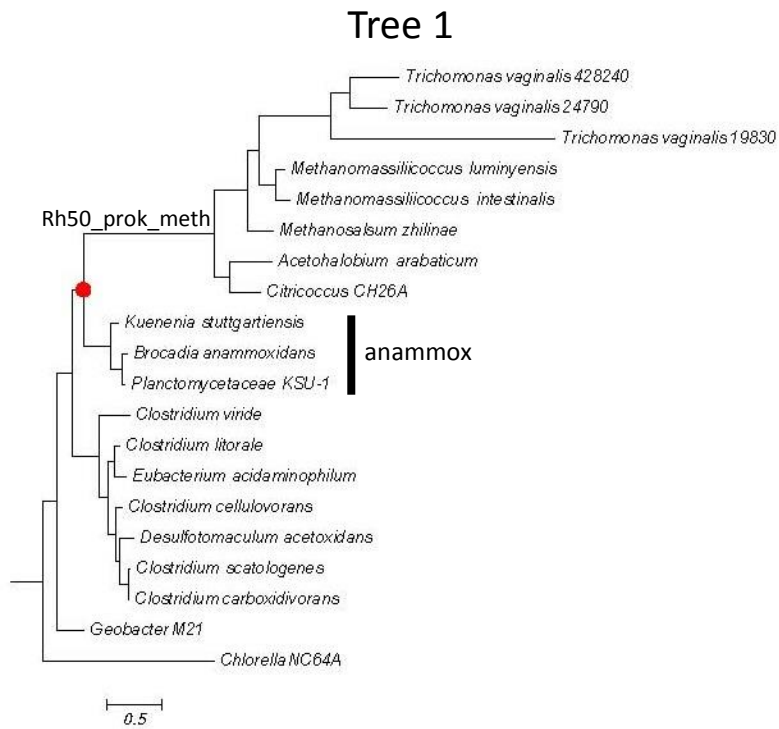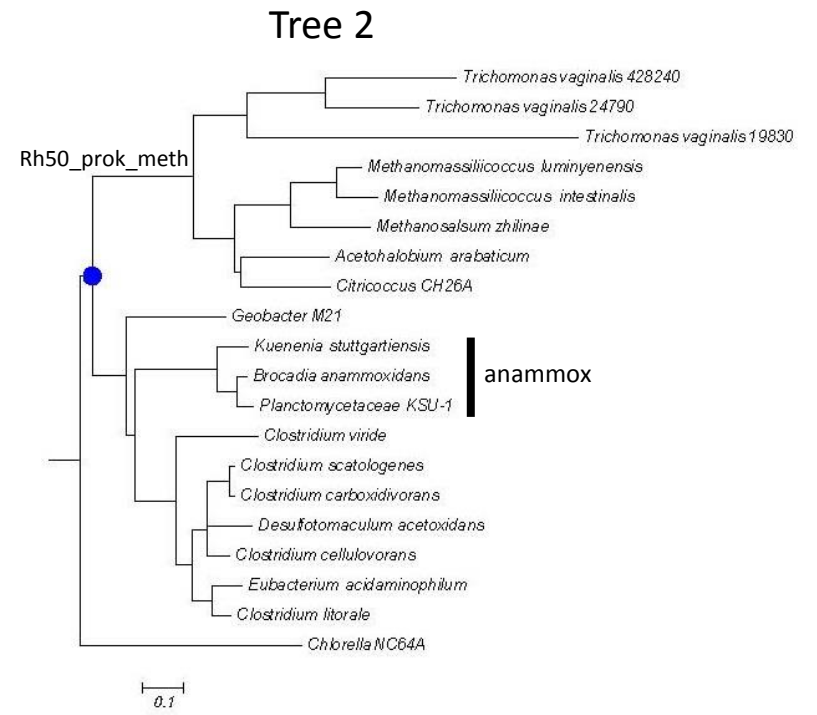

|              | rank | item | obs   | au           | np           | bp           | pp           | kh           | sh           | wkh          | wsh          |
|--------------|------|------|-------|--------------|--------------|--------------|--------------|--------------|--------------|--------------|--------------|
| <b>Tree1</b> | 1    | 1    | -34.6 | <b>0.998</b> | <b>0.997</b> | <b>0.997</b> | <b>1.000</b> | <b>0.992</b> | <b>0.992</b> | <b>0.992</b> | <b>0.992</b> |
| Tree2        | 2    | 2    | 34.6  | 0.002        | 0.003        | 0.003        | 9e-16        | 0.008        | 0.008        | 0.008        | 0.008        |

CONSEL

|              | PP              | ELW (RAxML) |
|--------------|-----------------|-------------|
| <b>Tree1</b> | <b>0.997325</b> |             |
| Tree2        | 0.002675        |             |

Fig. S4
